# Supplementary material
Source: PubMed Central journal article supplement (PMC5498225)

**A**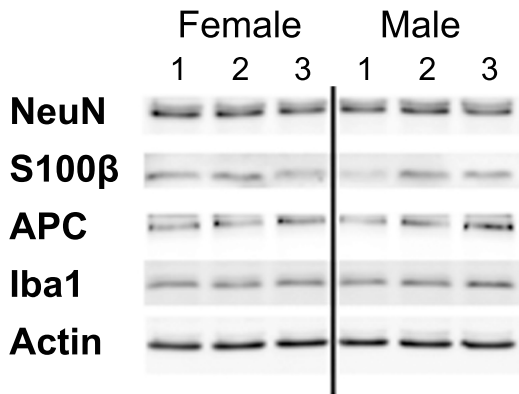**B**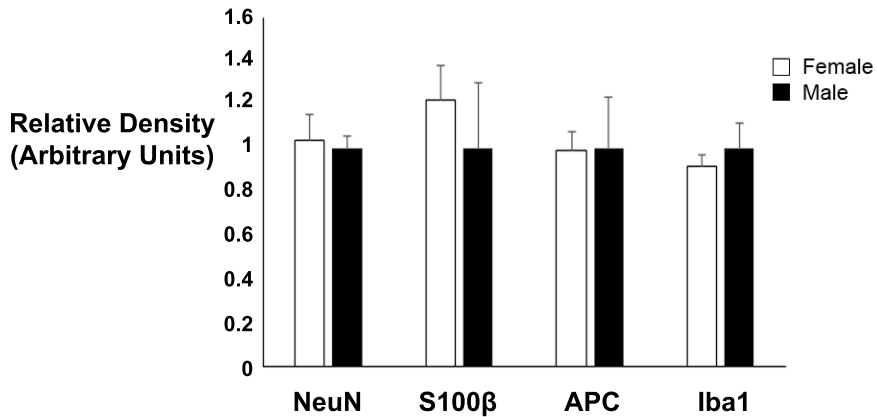

Supplement: NIHMS848175-supplement-1.pdf [file NIHMS848175-supplement-1.pdf]
